# Supplementary material for: Evaluation of the Antiproliferative Properties of CpRu Complexes Containing N-Methylated Triazaphosphaadamantane Derivatives
Source: Hindawi journal article supplement (doi:10.1155/2023/6669394), 2023-09-28
Supplement: f1 [file 6669394.f1.zip]

## Datablock: mo\_aa444\_0ma

|                      |                                                   |                                                   |
|----------------------|---------------------------------------------------|---------------------------------------------------|
| Bond precision:      | C-C = 0.0037 A                                    | Wavelength=0.71073                                |
| Cell:                | a=12.8359(7) b=14.4650(8) c=19.5733(12)           |                                                   |
|                      | alpha=92.140(2) beta=104.143(2) gamma=111.894(1)  |                                                   |
| Temperature          | 100 K                                             |                                                   |
| :                    |                                                   |                                                   |
|                      | Calculated                                        | Reported                                          |
| Volume               | 3236.4(3)                                         | 3236.4(3)                                         |
| Space group          | P -1                                              | P -1                                              |
| Hall group           | -P 1                                              | -P 1                                              |
| Moiety formula       | C48 H51 Cl2 N3 P3 Pd Ru, C F3<br>O3 S, 4(C H Cl3) | C48 H51 Cl2 N3 P3 Pd Ru, C F3<br>O3 S, 4(C H Cl3) |
| Sum formula          | C53 H55 Cl14 F3 N3 O3 P3 Pd Ru<br>S               | C53 H55 Cl14 F3 N3 O3 P3 Pd Ru<br>S               |
| Mr                   | 1667.77                                           | 1667.74                                           |
| Dx,g cm-3            | 1.711                                             | 1.711                                             |
| Z                    | 2                                                 | 2                                                 |
| Mu (mm-1)            | 1.249                                             | 1.249                                             |
| F000                 | 1668.0                                            | 1668.0                                            |
| F000'                | 1668.98                                           |                                                   |
| h,k,lmax             | 18,20,27                                          | 18,20,27                                          |
| Nref                 | 18943                                             | 18933                                             |
| Tmin,Tmax            | 0.861,0.883                                       | 0.656,0.747                                       |
| Tmin'                | 0.687                                             |                                                   |
| Correction method=   | # Reported T Limits: Tmin=0.656                   |                                                   |
| Tmax=0.747 AbsCorr = | MULTI-SCAN                                        |                                                   |
| Data completeness=   | 0.999                                             | Theta(max)= 30.034                                |
| R(reflections)=      | 0.0360( 17788)                                    | wR2(reflections)=<br>0.0761( 18933)               |
| S =                  | 1.145                                             | Npar= 921                                         |

The following ALERTS were generated. Each ALERT has the format

**test-name\_ALERT\_alert-type\_alert-level.**

Click on the hyperlinks for more details of the test.

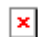

### Alert level C

|                                   |                                           |                   |                                 |       |       |           |
|-----------------------------------|-------------------------------------------|-------------------|---------------------------------|-------|-------|-----------|
| <a href="#">PLAT220_ALERT_2_C</a> | NonSolvent                                | Resd 1 C          | Ueq(max)/Ueq(min)               | Range | 3.2   | Ratio     |
| <a href="#">PLAT244_ALERT_4_C</a> | Low                                       | 'Solvent'         | Ueq as Compared to Neighbors of |       |       | S1T Check |
| <a href="#">PLAT244_ALERT_4_C</a> | Low                                       | 'Solvent'         | Ueq as Compared to Neighbors of |       |       | C1C Check |
| <a href="#">PLAT336_ALERT_2_C</a> | Long Bond Distance for                    | ..... C2C         | -Cl14                           |       | 1.930 | Ang.      |
| <a href="#">PLAT906_ALERT_3_C</a> | Large K Value in the Analysis of Variance | .....             |                                 |       | 2.701 | Check     |
| <a href="#">PLAT910_ALERT_3_C</a> | Missing # of FCF Reflection(s)            | Below Theta(Min). |                                 |       | 6     | Note      |
| <a href="#">PLAT911_ALERT_3_C</a> | Missing FCF Refl Between Thmin & STh/L=   | 0.600             |                                 |       | 4     | Report    |
| <a href="#">PLAT977_ALERT_2_C</a> | Check Negative Difference Density on H3CA | .                 |                                 |       | -0.31 | eA-3      |

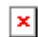

### Alert level G

|                                   |                                                  |                 |       |   |      |              |
|-----------------------------------|--------------------------------------------------|-----------------|-------|---|------|--------------|
| <a href="#">PLAT002_ALERT_2_G</a> | Number of Distance or Angle Restraints on AtSite |                 |       |   | 4    | Note         |
| <a href="#">PLAT012_ALERT_1_G</a> | N.O.K. _shelx_res_checksum Found in CIF          | .....           |       |   |      | Please Check |
| <a href="#">PLAT083_ALERT_2_G</a> | SHELXL Second Parameter in WGHT                  | Unusually Large |       |   | 7.44 | Why ?        |
| <a href="#">PLAT171_ALERT_4_G</a> | The CIF-Embedded .res File Contains              | EADP Records    |       |   | 2    | Report       |
| <a href="#">PLAT172_ALERT_4_G</a> | The CIF-Embedded .res File Contains              | DFIX Records    |       |   | 6    | Report       |
| <a href="#">PLAT231_ALERT_4_G</a> | Hirshfeld Test (Solvent)                         | Cl11            | --C2C | . | 17.5 | s.u.         |

#### And 2 other PLAT231 Alerts

|                                   |                          |      |       |   |      |      |
|-----------------------------------|--------------------------|------|-------|---|------|------|
| <a href="#">PLAT231_ALERT_4_G</a> | Hirshfeld Test (Solvent) | Cl12 | --C2C | . | 14.5 | s.u. |
| <a href="#">PLAT231_ALERT_4_G</a> | Hirshfeld Test (Solvent) | Cl14 | --C2C | . | 9.0  | s.u. |

|                                   |                                                |     |      |   |     |      |
|-----------------------------------|------------------------------------------------|-----|------|---|-----|------|
| <a href="#">PLAT232_ALERT_2_G</a> | Hirshfeld Test Diff (M-X)                      | Ru1 | --P2 | . | 5.5 | s.u. |
| <a href="#">PLAT302_ALERT_4_G</a> | Anion/Solvent/Minor-Residue Disorder (Resd 2 ) |     |      |   | 88% | Note |

#### And 6 other PLAT302 Alerts

|                                   |                                                                               |            |
|-----------------------------------|-------------------------------------------------------------------------------|------------|
| <a href="#">PLAT302_ALERT_4_G</a> | Anion/Solvent/Minor-Residue Disorder (Resd 3 )                                | 75% Note   |
| <a href="#">PLAT302_ALERT_4_G</a> | Anion/Solvent/Minor-Residue Disorder (Resd 4 )                                | 100% Note  |
| <a href="#">PLAT302_ALERT_4_G</a> | Anion/Solvent/Minor-Residue Disorder (Resd 5 )                                | 100% Note  |
| <a href="#">PLAT302_ALERT_4_G</a> | Anion/Solvent/Minor-Residue Disorder (Resd 7 )                                | 100% Note  |
| <a href="#">PLAT302_ALERT_4_G</a> | Anion/Solvent/Minor-Residue Disorder (Resd 8 )                                | 100% Note  |
| <a href="#">PLAT302_ALERT_4_G</a> | Anion/Solvent/Minor-Residue Disorder (Resd 9 )                                | 100% Note  |
| <br>                              |                                                                               |            |
| <a href="#">PLAT304_ALERT_4_G</a> | Non-Integer Number of Atoms in ..... (Resd 4 )                                | 2.61 Check |
| <b>And 4 other PLAT304 Alerts</b> |                                                                               |            |
| <a href="#">PLAT304_ALERT_4_G</a> | Non-Integer Number of Atoms in ..... (Resd 5 )                                | 3.87 Check |
| <a href="#">PLAT304_ALERT_4_G</a> | Non-Integer Number of Atoms in ..... (Resd 7 )                                | 1.64 Check |
| <a href="#">PLAT304_ALERT_4_G</a> | Non-Integer Number of Atoms in ..... (Resd 8 )                                | 0.76 Check |
| <a href="#">PLAT304_ALERT_4_G</a> | Non-Integer Number of Atoms in ..... (Resd 9 )                                | 1.13 Check |
| <br>                              |                                                                               |            |
| <a href="#">PLAT432_ALERT_2_G</a> | Short Inter X...Y Contact C116 ..C12 . 3.23 Ang.<br>1-x,2-y,1-z = 2_676 Check |            |
| <b>And 2 other PLAT432 Alerts</b> |                                                                               |            |
| <a href="#">PLAT432_ALERT_2_G</a> | Short Inter X...Y Contact C117 ..C30 . 3.08 Ang.<br>x,1+y,z = 1_565 Check     |            |
| <a href="#">PLAT432_ALERT_2_G</a> | Short Inter X...Y Contact C15C ..C24 . 3.19 Ang.<br>1-x,1-y,1-z = 2_666 Check |            |
| <b>And 2 other PLAT432 Alerts</b> |                                                                               |            |
| <a href="#">PLAT432_ALERT_2_G</a> | Short Inter X...Y Contact C119 ..C5 . 3.18 Ang.<br>x,y,z = 1_555 Check        |            |
| <a href="#">PLAT432_ALERT_2_G</a> | Short Inter X...Y Contact C120 ..C24 . 3.15 Ang.<br>1-x,2-y,1-z = 2_676 Check |            |
| <a href="#">PLAT720_ALERT_4_G</a> | Number of Unusual/Non-Standard Labels .....                                   | 25 Note    |
| <a href="#">PLAT790_ALERT_4_G</a> | Centre of Gravity not Within Unit Cell: Resd. #                               | 5 Note     |
|                                   | C H Cl3                                                                       |            |
| <a href="#">PLAT790_ALERT_4_G</a> | Centre of Gravity not Within Unit Cell: Resd. #                               | 9 Note     |
|                                   | C H Cl3                                                                       |            |
| <a href="#">PLAT794_ALERT_5_G</a> | Tentative Bond Valency for Pd1 (II) .                                         | 1.91 Info  |
| <a href="#">PLAT860_ALERT_3_G</a> | Number of Least-Squares Restraints .....                                      | 7 Note     |
| <a href="#">PLAT912_ALERT_4_G</a> | Missing # of FCF Reflections Above STh/L= 0.600                               | 1 Note     |
| <a href="#">PLAT913_ALERT_3_G</a> | Missing # of Very Strong Reflections in FCF ....                              | 1 Note     |
| <a href="#">PLAT933_ALERT_2_G</a> | Number of HKL-OMIT Records in Embedded .res File                              | 1 Note     |
| <a href="#">PLAT978_ALERT_2_G</a> | Number C-C Bonds with Positive Residual Density.                              | 2 Info     |

0 **ALERT level A** = Most likely a serious problem - resolve or explain  
0 **ALERT level B** = A potentially serious problem, consider carefully  
8 **ALERT level C** = Check. Ensure it is not caused by an omission or oversight  
35 **ALERT level G** = General information/check it is not something unexpected

1 ALERT type 1 CIF construction/syntax error, inconsistent or missing data  
13 ALERT type 2 Indicator that the structure model may be wrong or deficient  
5 ALERT type 3 Indicator that the structure quality may be low  
23 ALERT type 4 Improvement, methodology, query or suggestion  
1 ALERT type 5 Informative message, check

It is advisable to attempt to resolve as many as possible of the alerts in all categories. Often the minor alerts point to easily fixed oversights, errors and omissions in your CIF or refinement strategy, so attention to these fine details can be worthwhile. In order to resolve some of the more serious problems it may be necessary to carry out additional measurements or structure refinements. However, the purpose of your study may justify the reported deviations and the more serious of these should normally be commented upon in the discussion or experimental section of a paper or in the "special\_details" fields of the CIF. checkCIF was carefully designed to identify outliers and unusual parameters, but every test has its limitations and alerts that are not important in a particular case may appear. Conversely, the absence of alerts does not guarantee there are no aspects of the results needing attention. It is up to the individual to critically assess their own results and, if necessary, seek expert

advice.

## Publication of your CIF in IUCr journals

A basic structural check has been run on your CIF. These basic checks will be run on all CIFs submitted for publication in IUCr journals (*Acta Crystallographica*, *Journal of Applied Crystallography*, *Journal of Synchrotron Radiation*); however, if you intend to submit to *Acta Crystallographica Section C* or *E* or *IUCrData*, you should make sure that [full publication checks](#) are run on the final version of your CIF prior to submission.

## Publication of your CIF in other journals

Please refer to the *Notes for Authors* of the relevant journal for any special instructions relating to CIF submission.

---

PLATON version of 10/05/2023; check.def file version of 10/05/2023

## Datablock mo\_aa444\_0ma - ellipsoid plot

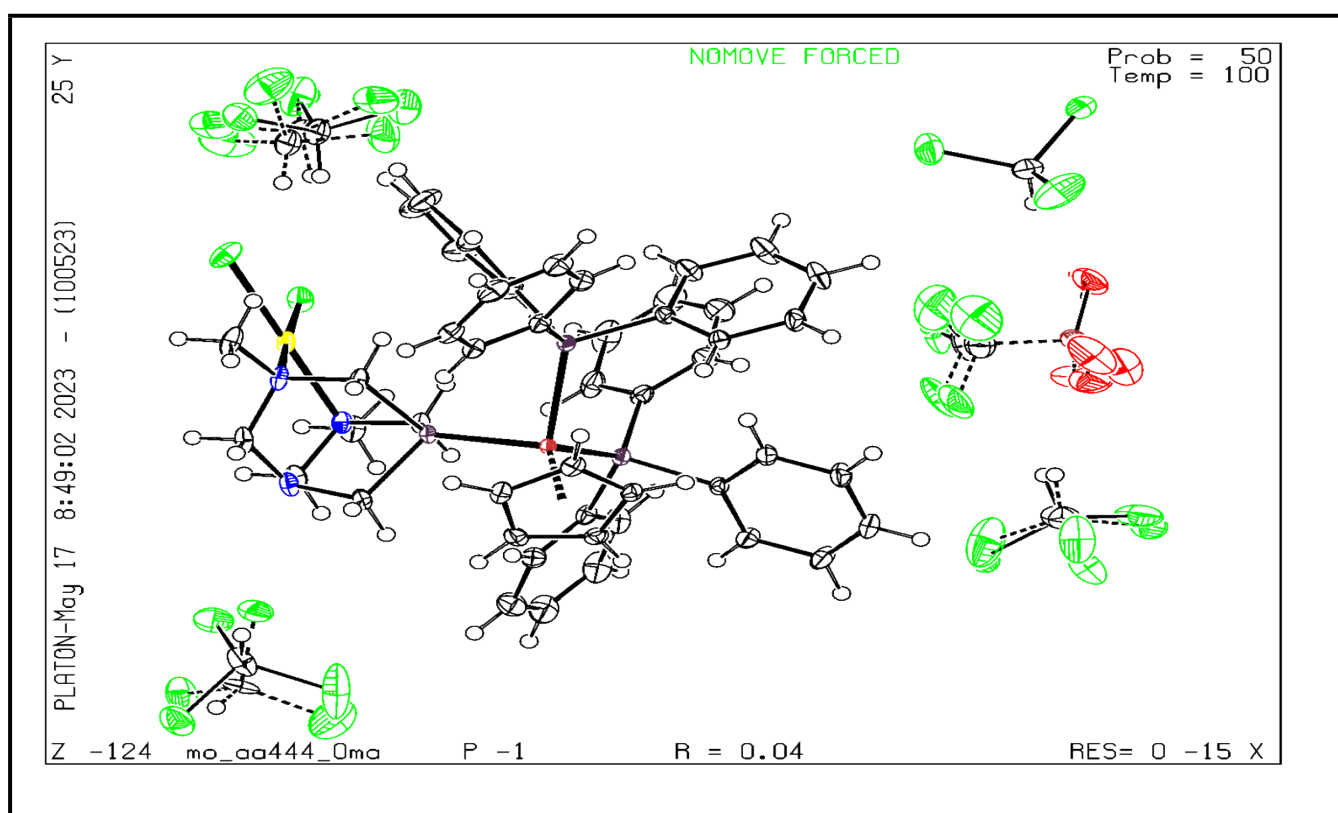

---

[Download CIF editor \(pubCIF\) from the IUCr](#)

[Download CIF editor \(enCIFer\) from the CCDC](#)

[Test a new CIF entry](#)
