# Supplementary material for: Evaluation of the Antiproliferative Properties of CpRu Complexes Containing N-Methylated Triazaphosphaadamantane Derivatives
Source: Hindawi journal article supplement (doi:10.1155/2023/6669394), 2023-09-28
Supplement: f1 [file 6669394.f1.zip]

No syntax errors found.  
Please wait while processing ....

[CIF dictionary](#)  
[Interpreting this report](#)

## Datablock: mo\_aaa\_fr\_0m

|                      |                                             |                                             |
|----------------------|---------------------------------------------|---------------------------------------------|
| Bond precision:      | C-C = 0.0066 A                              | Wavelength=0.71073                          |
| Cell:                | a=9.5483(2)    b=11.6728(2)    c=40.0824(8) |                                             |
|                      | alpha=90    beta=95.371(1)    gamma=90      |                                             |
| Temperature          | 302 K                                       |                                             |
| :                    |                                             |                                             |
|                      | Calculated                                  | Reported                                    |
| Volume               | 4447.79(15)                                 | 4447.79(15)                                 |
| Space group          | P 21/c                                      | P 1 21/c 1                                  |
| Hall group           | -P 2ybc                                     | -P 2ybc                                     |
| Moiety formula       | C32 H43 N3 O P2 Ru S, 2(C F3 O3 S), C3 H6 O | C32 H43 N3 O P2 Ru S, 2(C F3 O3 S), C3 H6 O |
| Sum formula          | C37 H49 F6 N3 O8 P2 Ru S3                   | C37 H49 F6 N3 O8 P2 Ru S3                   |
| Mr                   | 1036.98                                     | 1036.98                                     |
| Dx,g cm-3            | 1.549                                       | 1.549                                       |
| Z                    | 4                                           | 4                                           |
| Mu (mm-1)            | 0.642                                       | 0.642                                       |
| F000                 | 2128.0                                      | 2128.0                                      |
| F000'                | 2126.34                                     |                                             |
| h,k,lmax             | 14,17,58                                    | 14,17,58                                    |
| Nref                 | 14789                                       | 14781                                       |
| Tmin,Tmax            | 0.781,0.825                                 | 0.066,0.102                                 |
| Tmin'                | 0.766                                       |                                             |
| Correction method=   | # Reported T Limits: Tmin=0.066             |                                             |
| Tmax=0.102 AbsCorr = | MULTI-SCAN                                  |                                             |
| Data completeness=   | 0.999    Theta(max)= 31.506                 |                                             |
| R(reflections)=      | 0.0622( 11828)                              | wR2(reflections)=<br>0.1620( 14781)         |
| S = 1.061            | Npar= 551                                   |                                             |

The following ALERTS were generated. Each ALERT has the format

**test-name\_ALERT\_alert-type\_alert-level.**

Click on the hyperlinks for more details of the test.

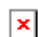

### Alert level C

|                                   |                                                  |                                           |             |
|-----------------------------------|--------------------------------------------------|-------------------------------------------|-------------|
| <a href="#">PLAT241_ALERT_2_C</a> | High                                             | 'MainMol' Ueq as Compared to Neighbors of | C16 Check   |
| <a href="#">PLAT242_ALERT_2_C</a> | Low                                              | 'MainMol' Ueq as Compared to Neighbors of | Ru1 Check   |
| <a href="#">PLAT244_ALERT_4_C</a> | Low                                              | 'Solvent' Ueq as Compared to Neighbors of | S1T Check   |
| <a href="#">PLAT244_ALERT_4_C</a> | Low                                              | 'Solvent' Ueq as Compared to Neighbors of | C2A Check   |
| <a href="#">PLAT260_ALERT_2_C</a> | Large Average Ueq of Residue Including           | S1T                                       | 0.113 Check |
| <a href="#">PLAT906_ALERT_3_C</a> | Large K Value in the Analysis of Variance .....  |                                           | 6.427 Check |
| <a href="#">PLAT911_ALERT_3_C</a> | Missing FCF Refl Between Thmin & STh/L=          | 0.600                                     | 6 Report    |
| <a href="#">PLAT913_ALERT_3_C</a> | Missing # of Very Strong Reflections in FCF .... |                                           | 4 Note      |
| <a href="#">PLAT976_ALERT_2_C</a> | Check Calcd Resid. Dens.                         | 0.47Ang From O5TA                         | -0.54 eA-3  |

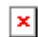

### Alert level G

|                                   |                                         |                 |            |
|-----------------------------------|-----------------------------------------|-----------------|------------|
| <a href="#">PLAT007_ALERT_5_G</a> | Number of Unrefined Donor-H Atoms ..... |                 | 1 Report   |
| <a href="#">PLAT083_ALERT_2_G</a> | SHELXL Second Parameter in WGHT         | Unusually Large | 8.15 Why ? |
| <a href="#">PLAT171_ALERT_4_G</a> | The CIF-Embedded .res File Contains     | EADP Records    | 5 Report   |
| <a href="#">PLAT187_ALERT_4_G</a> | The CIF-Embedded .res File Contains     | RIGU Records    | 1 Report   |
| <a href="#">PLAT231_ALERT_4_G</a> | Hirshfeld Test (Solvent)                | S2TA    --O4TA  | 11.3 s.u.  |

#### And 10 other PLAT231 Alerts

|                                   |                          |      |        |   |           |
|-----------------------------------|--------------------------|------|--------|---|-----------|
| <a href="#">PLAT231_ALERT_4_G</a> | Hirshfeld Test (Solvent) | S2TA | --O6TA | . | 11.0 s.u. |
| <a href="#">PLAT231_ALERT_4_G</a> | Hirshfeld Test (Solvent) | S2TA | --O5TA | . | 15.0 s.u. |
| <a href="#">PLAT231_ALERT_4_G</a> | Hirshfeld Test (Solvent) | S2TB | --C2T  | . | 6.4 s.u.  |
| <a href="#">PLAT231_ALERT_4_G</a> | Hirshfeld Test (Solvent) | F4TA | --C2T  | . | 5.4 s.u.  |
| <a href="#">PLAT231_ALERT_4_G</a> | Hirshfeld Test (Solvent) | F6TA | --C2T  | . | 6.4 s.u.  |
| <a href="#">PLAT231_ALERT_4_G</a> | Hirshfeld Test (Solvent) | F5TA | --C2T  | . | 5.6 s.u.  |
| <a href="#">PLAT231_ALERT_4_G</a> | Hirshfeld Test (Solvent) | S1T  | --C1T  | . | 6.2 s.u.  |
| <a href="#">PLAT231_ALERT_4_G</a> | Hirshfeld Test (Solvent) | F1T  | --C1T  | . | 7.7 s.u.  |

|                                   |                          |     |       |   |           |
|-----------------------------------|--------------------------|-----|-------|---|-----------|
| <a href="#">PLAT231_ALERT_4_G</a> | Hirshfeld Test (Solvent) | F2T | --C1T | . | 9.2 s.u.  |
| <a href="#">PLAT231_ALERT_4_G</a> | Hirshfeld Test (Solvent) | F3T | --C1T | . | 14.0 s.u. |

|                                   |                                                  |           |
|-----------------------------------|--------------------------------------------------|-----------|
| <a href="#">PLAT244_ALERT_4_G</a> | Low 'Solvent' Ueq as Compared to Neighbors of    | C1T Check |
| <a href="#">PLAT302_ALERT_4_G</a> | Anion/Solvent/Minor-Residue Disorder (Resd 2 )   | 88% Note  |
| <a href="#">PLAT720_ALERT_4_G</a> | Number of Unusual/Non-Standard Labels .....      | 20 Note   |
| <a href="#">PLAT860_ALERT_3_G</a> | Number of Least-Squares Restraints .....         | 511 Note  |
| <a href="#">PLAT910_ALERT_3_G</a> | Missing # of FCF Reflection(s) Below Theta(Min). | 2 Note    |
| <a href="#">PLAT978_ALERT_2_G</a> | Number C-C Bonds with Positive Residual Density. | 0 Info    |
| <a href="#">PLAT992_ALERT_5_G</a> | Repd & Actual _reflns_number_gt Values Differ by | 2 Check   |

0 **ALERT level A** = Most likely a serious problem - resolve or explain  
0 **ALERT level B** = A potentially serious problem, consider carefully  
9 **ALERT level C** = Check. Ensure it is not caused by an omission or oversight  
22 **ALERT level G** = General information/check it is not something unexpected

0 ALERT type 1 CIF construction/syntax error, inconsistent or missing data  
6 ALERT type 2 Indicator that the structure model may be wrong or deficient  
5 ALERT type 3 Indicator that the structure quality may be low  
18 ALERT type 4 Improvement, methodology, query or suggestion  
2 ALERT type 5 Informative message, check

It is advisable to attempt to resolve as many as possible of the alerts in all categories. Often the minor alerts point to easily fixed oversights, errors and omissions in your CIF or refinement strategy, so attention to these fine details can be worthwhile. In order to resolve some of the more serious problems it may be necessary to carry out additional measurements or structure refinements. However, the purpose of your study may justify the reported deviations and the more serious of these should normally be commented upon in the discussion or experimental section of a paper or in the "special\_details" fields of the CIF. checkCIF was carefully designed to identify outliers and unusual parameters, but every test has its limitations and alerts that are not important in a particular case may appear. Conversely, the absence of alerts does not guarantee there are no aspects of the results needing attention. It is up to the individual to critically assess their own results and, if necessary, seek expert advice.

## Publication of your CIF in IUCr journals

A basic structural check has been run on your CIF. These basic checks will be run on all CIFs submitted for publication in IUCr journals (*Acta Crystallographica*, *Journal of Applied Crystallography*, *Journal of Synchrotron Radiation*); however, if you intend to submit to *Acta Crystallographica Section C* or *E* or *IUCrData*, you should make sure that [full publication checks](#) are run on the final version of your CIF prior to submission.

## Publication of your CIF in other journals

Please refer to the *Notes for Authors* of the relevant journal for any special instructions relating to CIF submission.

PLATON version of 10/05/2023; check.def file version of 10/05/2023

Datablock mo\_aaa\_fr\_0m - ellipsoid plot

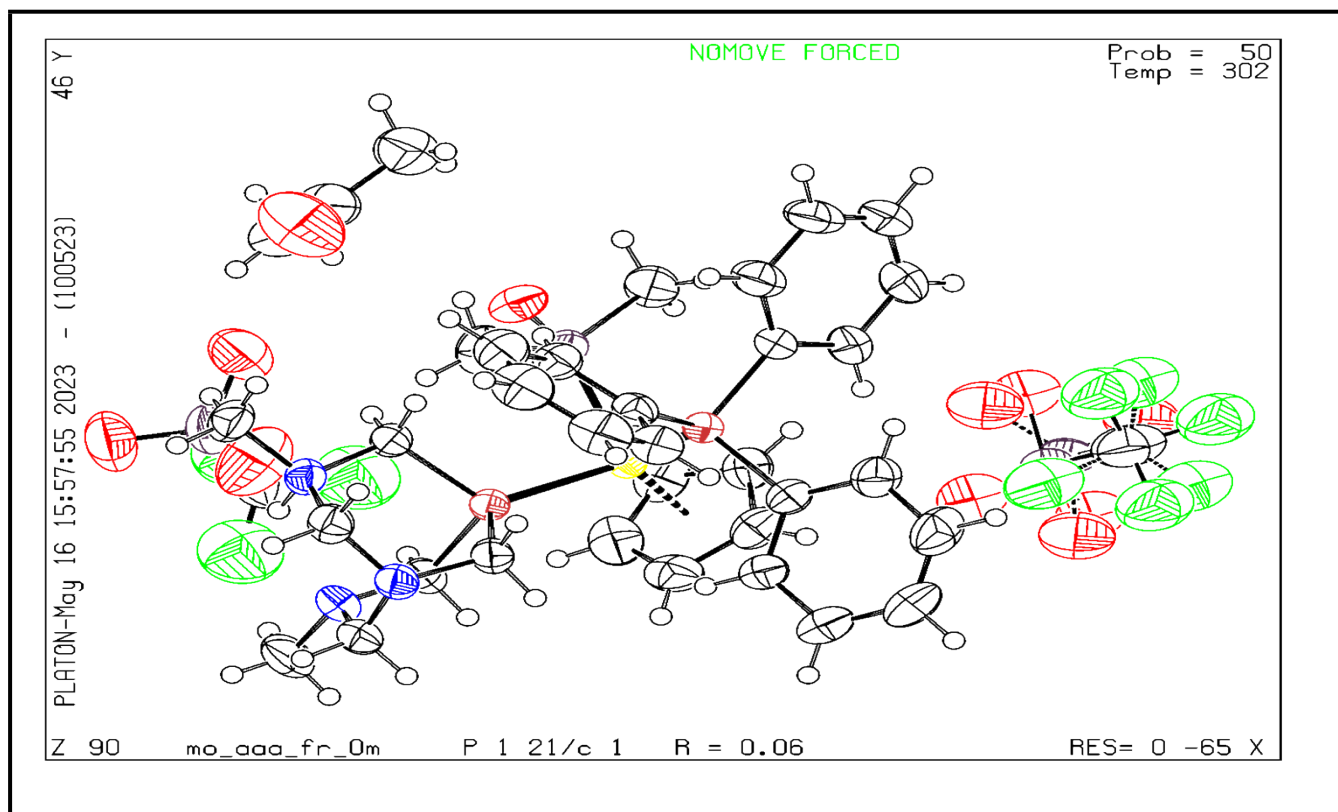

[Download CIF editor \(publCIF\) from the IUCr](#)  
[Download CIF editor \(enCIFer\) from the CCDC](#)  
[Test a new CIF entry](#)
