# Supplementary material for: Evaluation of the Antiproliferative Properties of CpRu Complexes Containing N-Methylated Triazaphosphaadamantane Derivatives
Source: Bioinorg Chem Appl. 2023 Sep 28;2023:6669394. doi: 10.1155/2023/6669394 (PMC10555500; doi:10.1155/2023/6669394)
Supplement: Supplementary Materials — contains experimental procedures, NMR data, X-ray crystallographic data for 8 and 11, and antiproliferative and biological studies: stability tests in DMSO-d6 and DMSO-d6/D2O under air atmosphere; cell lines and culture conditions; compound cytotoxicity evaluated using the MTT assay; cell death measurement using flow cytometry: the annexin V/PI assay; complex uptake and distribution by ICP-MS; binding interaction with human serum albumin by steady-state and time-resolved fluorescence emission. Also, separate check cif files (PDF) for crystal structures of 8 and 11 were provided. [file 6669394.f1.zip]

Archive with 3 entries (3 files):
- 2261422_checkcif.pdf
- 2263437_checkcif.pdf
- SI_PTA_Ru_Lisbon-BCaA-3.3.docx
